# Racemization in Reverse: Evidence that D-Amino Acid Toxicity on Earth Is Controlled by Bacteria with Racemases

Gaosen Zhang, Henry J. Sun\*

Division of Earth and Ecosystem Sciences, Desert Research Institute, Las Vegas, Nevada, United States of America

## Abstract

D-amino acids are toxic for life on Earth. Yet, they form constantly due to geochemical racemization and bacterial growth (the cell walls of which contain D-amino acids), raising the fundamental question of how they ultimately are recycled. This study provides evidence that bacteria use D-amino acids as a source of nitrogen by running enzymatic racemization in reverse. Consequently, when soils are inundated with racemic amino acids, resident bacteria consume D- as well as L-enantiomers, either simultaneously or sequentially depending on the level of their racemase activity. Bacteria thus protect life on Earth by keeping environments D-amino acid free.

**Citation:** Zhang G, Sun HJ (2014) Racemization in Reverse: Evidence that D-Amino Acid Toxicity on Earth Is Controlled by Bacteria with Racemases. PLoS ONE 9(3): e92101. doi:10.1371/journal.pone.0092101

**Editor:** Vipul Bansal, RMIT University, Australia

**Received:** November 26, 2013; **Accepted:** February 17, 2014; **Published:** March 19, 2014

**Copyright:** © 2014 Zhang, Sun. This is an open-access article distributed under the terms of the Creative Commons Attribution License, which permits unrestricted use, distribution, and reproduction in any medium, provided the original author and source are credited.

**Funding:** The funding for this work was provided by the NASA Exobiology program and the NASA Astrobiology Institute. The funders had no role in study design, data collection and analysis, decision to publish, or preparation of the manuscript.

**Competing Interests:** The authors have declared that no competing interests exist.

\* E-mail: henry.sun@dri.edu

## Introduction

With the exception of glycine, all amino acids are chiral and may exist as levorotatory (L) or dextrorotatory (D) enantiomer. At Earth's surface temperatures amino acids spontaneously racemize, converting from one form to another [1]. Consequently, although on Earth organisms only synthesize L-enantiomers, the appearance of D-enantiomers is inevitable, especially in soils and sediments where amino acids are sequestered [1,2]. Additionally, in some organisms, racemization is enzymatically catalyzed (i.e. by racemases), and the resultant D-amino acids are incorporated into non-protein molecules. Such molecules include peptide antibiotics [3], siderophores [4], surfactins [5], and peptidoglycans [6]. The latter, which contain D-alanine, D-glutamic acid, and occasionally D-aspartic acid as well, are ubiquitous in bacterial and cyanobacterial cell walls. Relative to proteins, heterochiral peptides are recalcitrant [7,8]. As a result, oceans, sediments, and soils are enriched in peptide-bound D-amino acids [9–17]. In North American grassland soils, for instance, more than 10% of alanine, glutamic acid, aspartic acid, and leucine exist in D-forms [18].

The fate of D-amino acids during matter cycling is unknown. Early work considered the possibility of their utilization as a source of nitrogen by eukaryotes. Many eukaryotes possess D-amino acid oxidases (DAAOs), a detoxification enzyme that controls endogenous D-amino acids [19,20]. In the presence of DAAOs and molecular oxygen, D-enantiomers, but not L-enantiomers, are destroyed by oxidative deamination. Of the three products that result, hydrogen peroxide is detoxified by catalases, while  $\alpha$ -keto acid and ammonium may be metabolized as carbon and nitrogen sources. When exposed to external D-amino acids, however, only yeasts and fungi up-regulate DAAOs fast enough to turn toxicity

into nutrient [21–25]. Plants and mammals appear to lack such capacity and, as a result, suffer stunted growth [26–28].

Studies of *Methanococcus maripaludis*, an archaeon, and *Schizosaccharomyces pombe*, a yeast showed that enzymatic racemization can be coupled to L-amino acid catabolism as a more efficient way of catabolizing D-amino acids [29,30]. In both organisms, this capability is because of an inducible operon. The operon consists of three genes acquired from bacteria via lateral transfer that specify alanine permease, alanine racemase, and L-alanine dehydrogenase. The permease imports L- and D-alanine. Therefore, for *M. maripaludis* and *S. pombe*, D-alanine is essentially a source of L-alanine.

Here we provide evidence that all bacteria are capable of reverse racemization. Specifically, we show that when soils are inundated with LD-alanine, LD-aspartic acid, LD-glutamic acid, and LD-leucine, resident bacteria absorb L- and D-enantiomers in equal or nearly equal rates. In the case of alanine, the conversion of D-enantiomers appears to be enabled by constitutive alanine racemases that are ordinarily anabolic in function (i.e. cell wall synthesis). In the case of the other three amino acids, the exposure to L-enantiomers appears to induce catabolic racemases. As a result, as soon as L-enantiomers are exhausted, the organisms could consume D-enantiomers.

## Results

A simple nutrient solution containing 50 mM of D-glucose as a carbon source and 4 mM of LD-alanine, LD-aspartic acid, LD-glutamic acid, and LD-leucine as a nitrogen source was inoculated with soils. The soils originated from South and North American semiarid deserts, alpine forests, wetlands, and landscape lawns. They contained between  $1 \times 10^6$  and  $6 \times 10^6$  colony-forming units

(CFU) of bacteria per gram soil. The ratio of soil and medium was 1:2 (w:v). The soil suspensions were incubated at 20°C under aerobic conditions.

The ensuing absorption of amino acid enantiomers followed two patterns (Figure 1). For wetland and lawn soils, D- and L-alanine were consumed simultaneously and in equal rates. In all other cases, L- and D-enantiomers were consumed one after another. More specifically, the consumption of D-enantiomers occurred in three phases: a transient initial decline, an intervening phase of stasis, and a final phase of rapid utilization. Only the first phase was observed in sterile (autoclaved) soils, indicating that it is abiotic in nature (Figure S1). During the course of the experiment, the numbers of bacteria in the samples doubled 5–7 times.

To understand the consumption mechanisms, we studied the Mojave Desert soil and *Arthrobacter* sp., a bacterium isolated from the Atacama Desert, in more detail. When the soil received only D-enantiomers, consumption dynamics changed. In the case of D-alanine, absorption began immediately and was nearly identical in rate to that of L-alanine, determined in a separate sample (Figure 2A). Clearly, the organisms were capable of consuming D-alanine, but did not do so if L-alanine were available.

Without L-enantiomers, absorption dynamics of D-aspartic acid, D-glutamic acid, and D-leucine also were altered, but in a different fashion. Little or no activity occurred in the first few hours. With further incubation, consumption became progressively faster (Figure 2A). By hour 35, it was comparable to the consumption of corresponding L-enantiomers (Figure 2B). To

verify that L-enantiomers induced catabolism of D-enantiomers, we incubated soil in L-enantiomers before adding D-enantiomers. Consumption began immediately and was rapid (Figure 2C). When the same induced soil was given a mixture of L- and D-enantiomers, however, consumption of D-enantiomers began only after L-enantiomers were consumed (Figure 2D).

RNA synthesis and gene expression were essential to utilizing D-aspartic acid, D-glutamic acid, and D-leucine. In the presence of 25 mM of rifampicin, an antibiotic that inhibits RNA synthesis, utilization of these three D-enantiomers was prevented. Consumption of L-enantiomers and D-alanine, in contrast, remained intact, indicating that the failure to use D-aspartic acid, D-glutamic acid, and D-leucine was not due to cell death (Figure 2E).

When D- and L-aspartic acid were added to two *Arthrobacter* sp. cultures ( $10^8$  CFU/ml) as pure enantiomer preparations, they were consumed identically (Figure 3). When they were added as a mixture, utilization of D-aspartic acid did not begin until after L-aspartic acid was consumed.

## Discussion

Because D-alanine is an essential component of their cell wall [6,31,32], all bacteria are expected to synthesize alanine racemases constitutively. Although other D-amino acids are also essential, they do not necessarily require specific racemases to form. For instance, D-glutamic acid may form by racemization or transamination, between D-alanine and L-glutamic acid [33]. Our study suggests that when D-alanine is available externally, alanine

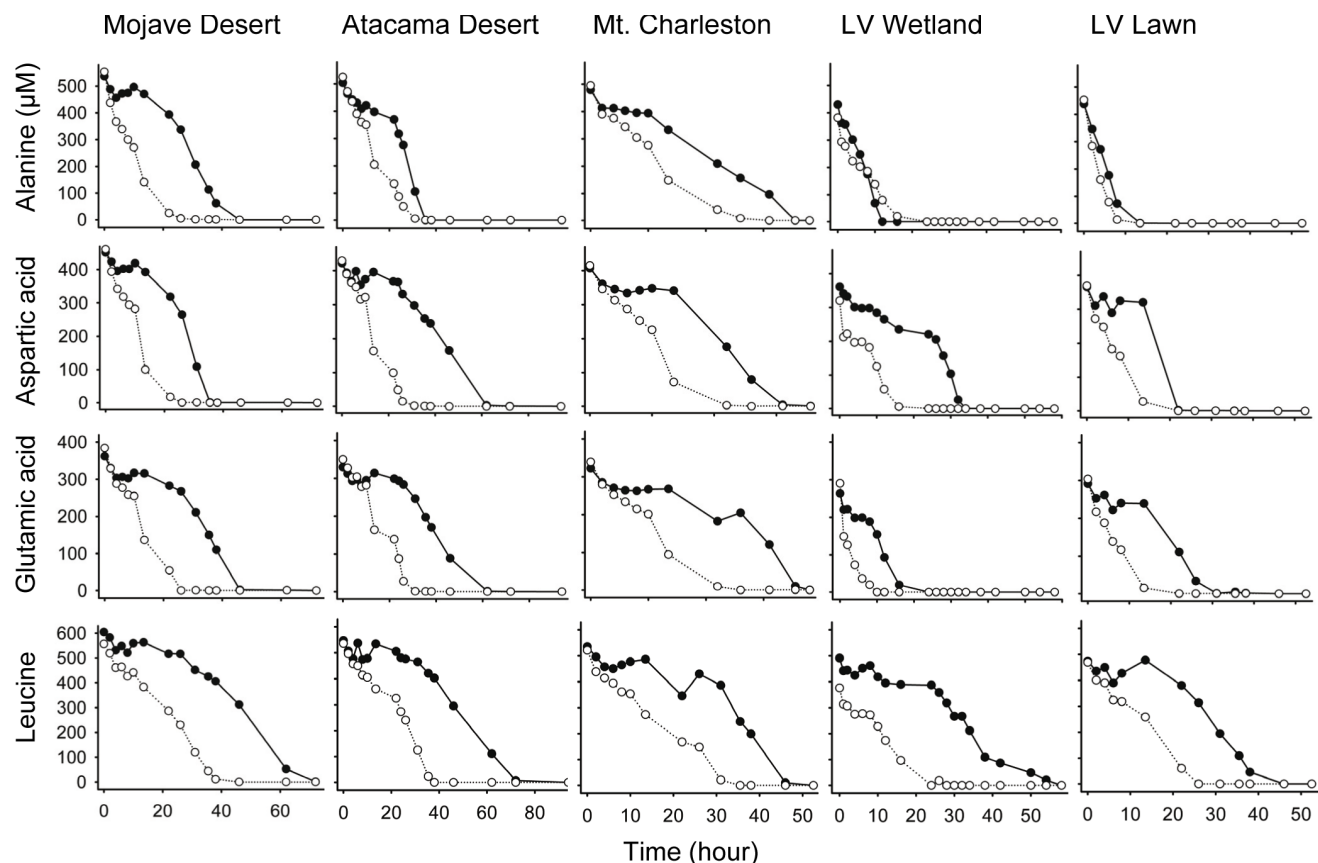

**Figure 1. Microbial consumption dynamics of racemic amino acids (L-enantiomers: open symbol; D-enantiomers: filled symbol) following addition to soils.** The rapid absorption of D-enantiomers is presumably by bacteria, which possess amino acid racemases and can turn D-enantiomers into L-forms.

doi:10.1371/journal.pone.0092101.g001

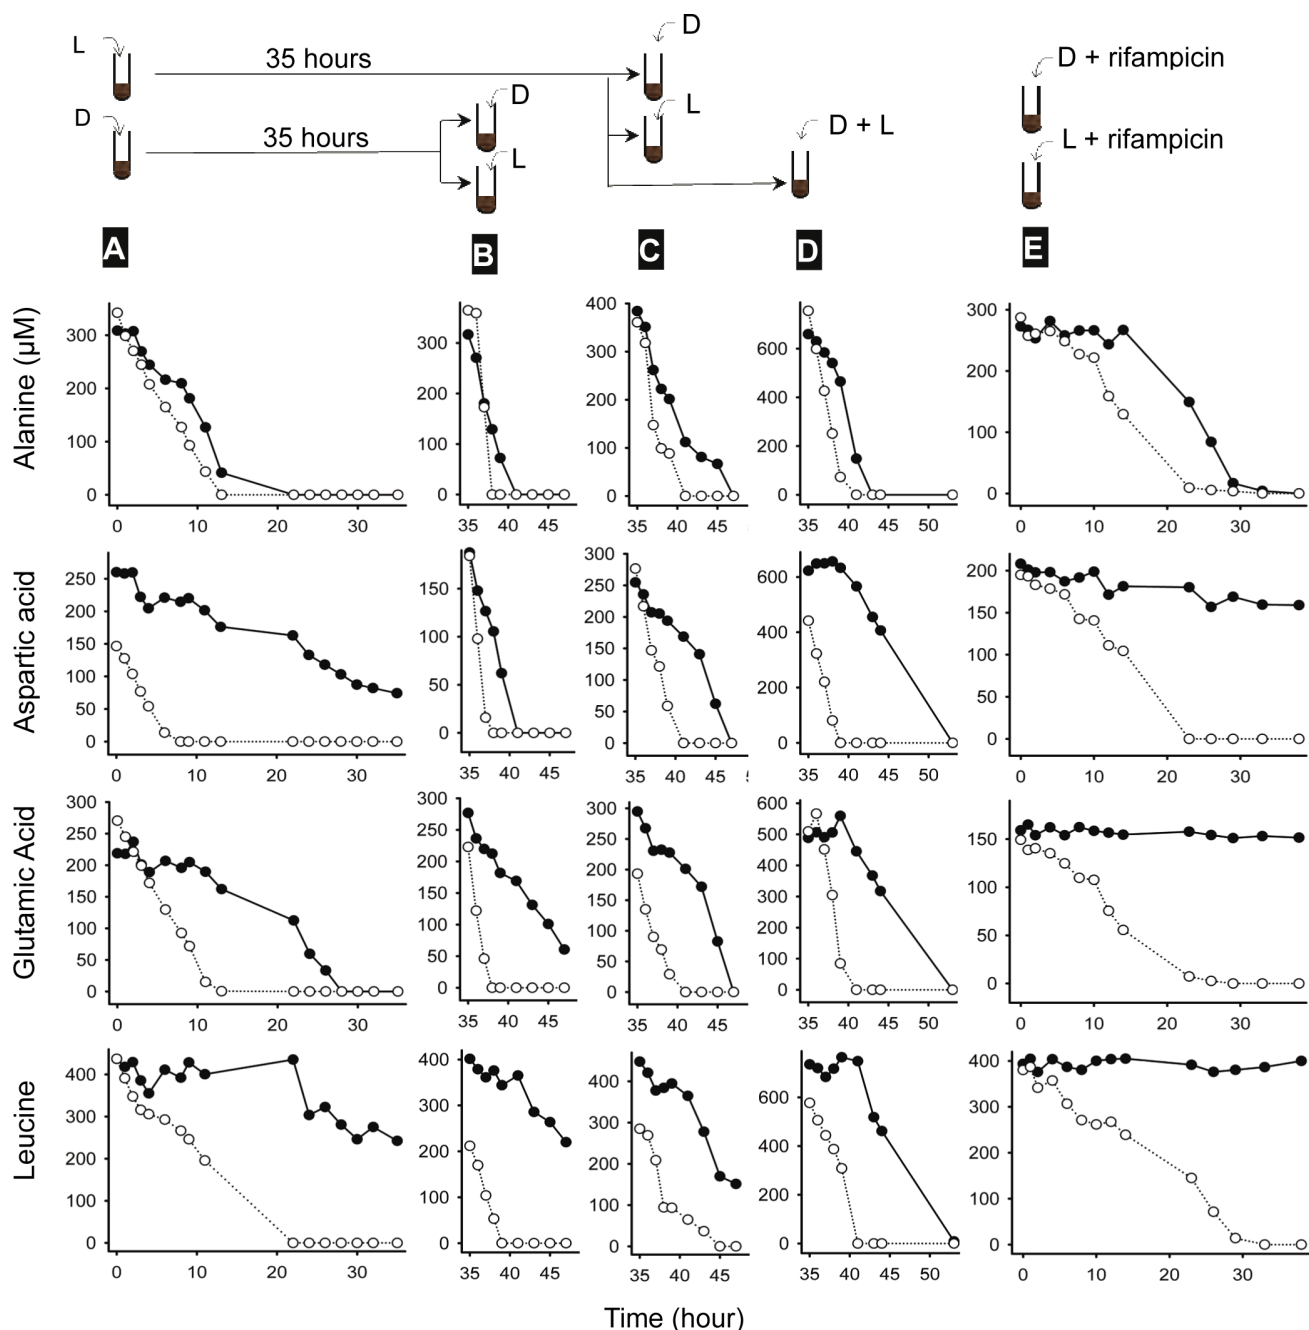

**Figure 2. Microbial consumption dynamics of amino acids (L-enantiomers: open symbol; D-enantiomers: filled symbol) by a Mojave Desert soil.** Amino acids were added under four different conditions: A) first injections containing L- or D-enantiomers; B) and C) second injections containing L- or D- enantiomers; D) second injections containing racemic mixtures; and E) first injections containing L- or D-enantiomers and 25 mM of rifampicin, an antibiotic that inhibits RNA synthesis. For bacteria to catabolize D-enantiomers two conditions must be met: 1) racemases are induced if not already present due to anabolic functions, e.g. alanine racemase, and 2) L-enantiomers are exhausted. doi:10.1371/journal.pone.0092101.g002

racemases are temporarily freed from anabolic commitment to serve a detoxification and catabolic function, turning excess D-alanine (beyond what is needed for cell wall synthesis) into a source of nitrogen.

Soil catabolic activities involving D-aspartic acid, D-glutamic acid, D-leucine almost certainly are enabled by induced racemases. In other words, catabolic operons like those in *M. maripaludis* and *S. pombe* but specific for aspartic acid, glutamic acid, and leucine are common in bacteria. The comparable or equal

consumption rates of L- and D-enantiomers (Figure 1) suggest that most or all bacteria that consume L-enantiomers also consume D-enantiomers. The contribution of DAAOs cannot be ruled out, but is likely minor, for two reasons. First, yeasts and fungi are present in these soils in minor numbers [34–36]. Second, DAAOs are induced by D-enantiomers, not L-enantiomers [21,24,37–40].

It may seem counterintuitive that catabolic racemases are induced by L-enantiomers. The ecological necessity of this feature becomes evident, however, if we consider the alternative: catabolic

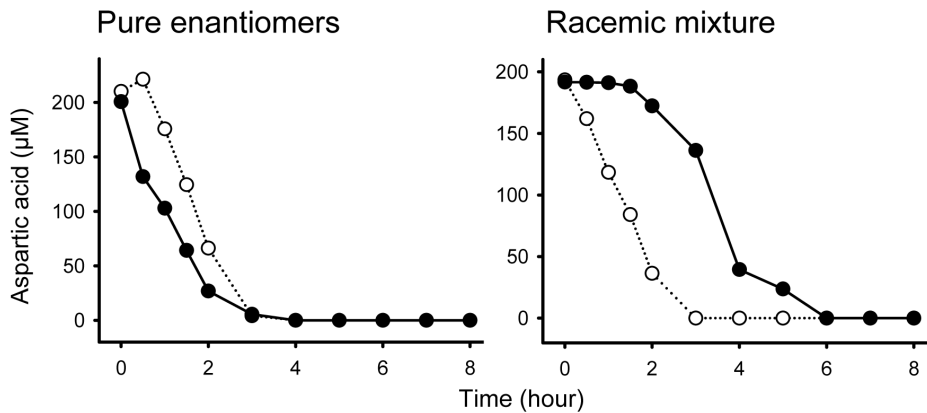

**Figure 3. Consumption dynamics of L- (open symbol) and D-aspartic acid (filled symbol) by bacterium *Arthrobacter* sp.** when they were added separately and in a racemic mixture. doi:10.1371/journal.pone.0092101.g003

operons are induced by D-amino acids only. That is, when encountering racemic amino acids, bacteria “wait” until after L-amino acids are exhausted to synthesize racemases. The organisms would find themselves in a dilemma. To use D-enantiomers, they need racemases. To manufacture racemases, however, they need L-enantiomers, which are no longer available and, without racemases, cannot be supplied by the conversion of D-enantiomers. This is why when only D-enantiomers are added to soils catabolic activities emerge slowly (Figure 2A). The fact that they emerge at all may be because of constitutive alanine racemases. Amino acids racemases are not highly specific. They bind multiple amino acids with varying degrees of efficiency. By expressing catabolic racemases while L-enantiomers are still available, however, bacteria avoid the dilemma and instead transition from using L-enantiomers to using D-enantiomers without interruption.

In racemase-enabled catabolism, D- and L-enantiomers compete with each other kinetically in an asymmetrical manner (Figure S2). Because L-enantiomers are assimilated without conversion, they are always at advantage and can competitively shut down the influx of D-enantiomers, but not vice versa. The application of Michaelis-Menten principles predicts three scenarios (Figure 4; for detailed model description see Text S1 and Figures S3, S4, S5). If the capacity of racemase exceeds that of permease, L- and D-enantiomers are consumed simultaneously and in equal rates (Figure 4, scenario I). This scenario describes the consumption of DL-alanine by wetland and lawn soils. If the capacity of racemase is less than or equal to that of permease, two

different scenarios may arise. If the capacity of racemase is greater than the excess capacity of permease above the rate of assimilation, L- and D-enantiomers are imported simultaneously but in unequal rates (Figure 4, scenario II). If the capacity of racemase is less than the excess capacity of permease, the influx of D-enantiomers is prevented. Consumption does not begin until L-enantiomers fall below a critical concentration (Figure 4, scenario III). Most of our soil results and the result with the bacterial isolate *Arthrobacter* sp. conform to scenario II or III.

Available evidence, therefore, warrants reassessment of the generally-held view that the primary biological function of racemases is D-amino acid making. Rather, racemases may have originated for detoxification of D-amino acids from geochemical racemization. Anabolic racemases are likely a secondary biological invention. This evolutionary sequence is more logical, since a detoxification mechanism needs to be in place before a toxin is synthesized for constructive purposes.

Today on Earth, bacteria are a source and also the primary sink for D-amino acids. The latter is a globe-wide ecosystem service. It prevents free-form D-amino acids from accumulating in the environments to toxic concentrations.

## Materials and Methods

Soils were collected from the Mojave Desert (N35°11'37", W115°49'42"), the Clark County Wetland Park (N36°6'8", W115°1'18"), and Mount Charleston (N36°16'19", W115°34'12") with permission from the Mojave National Preserve

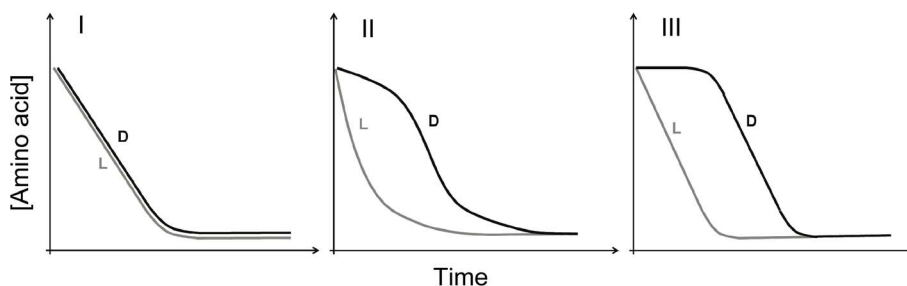

**Figure 4. Model-predicted bacterial consumption dynamics of racemic amino acids.** Three scenarios occur depending on relative racemase activity: I) the capacity of racemase exceeds that of permease (i.e.  $V_{R\max} > V_{L\max}$ ); II) the capacity of racemase is equal to or less than that of permease but greater than the excess permeation capacity above the rate of assimilation (i.e.  $V_{L\max} \geq V_{R\max} > V_{L\max} - V_{a\max}$ ); and III) the capacity of racemase is less than the excess permeation capacity (i.e.  $V_{R\max} < V_{L\max} - V_{a\max}$ ). doi:10.1371/journal.pone.0092101.g004

(permit# MOJA-00048), the Southern Nevada Water Authority, and the National Forest Service, respectively. No permits were required to collect from the Atacama Desert (S28°28'40", W70°42'42") or landscape lawns in Las Vegas (N36°6'47", W115°8'43"). None of these activities involved endangered or protected species. A soil import permit was issued by the US Department of Agriculture (P526-100813-013).

Bacteria were enumerated by serial dilution and plating on Lauria-Bertani agar. Study medium was prepared in 0.2 M phosphate buffer saline solution. Quantification of amino acid enantiomers followed the high performance liquid chromatography protocol of Zhao and Bada [41]. Briefly, 10 µl of sample supernatant were mixed with 10 µl of 0.2 M sodium borate buffer (pH 9.45) and 5 µl of *o*-phthalaldehyde and thiol N-acetyl-L-cysteine reagent. After one minute, the derivatization reaction was stopped by addition of 475 µl of 50 mM sodium acetate buffer. Immediately, 20 µl of the derivatized sample were analyzed on an Agilent 1100 HPLC system with a Phenomenex Luna C<sub>18</sub> column. The mobile phase consisted of methanol and 50 mM sodium acetate, mixed in a gradient program. The flow rate was 1 ml/minute. Column effluent was monitored with a fluorescence detector at excitation wavelength of 340 nm and emission wavelength of 450 nm. Amino acid quantity was calculated from peak area and calibrated against standards. Measurements were reproducible with less than 1% error.

## Supporting Information

**Figure S1 Abiotic adsorption of racemic amino acids (L-enantiomers: open symbol; D-enantiomers: filled symbol) by autoclaved soils.** Unlike biological consumption, this activity is transient and stereo-optically nonselective. (TIF)

**Figure S2 Schematic diagram of racemase-enabled consumption of racemic amino acids.** D- and L-enantiomers

are imported by the same permease. In the cell, D-enantiomers are converted to, and assimilated as, L-forms. (TIF)

**Figure S3 Model-predicted uptake of racemic amino acids when the capacity of racemases is greater than that of permease.** D- and L-enantiomers are consumed equally. (TIF)

**Figure S4 Model-predicted uptake dynamics of racemic amino acids when the capacity of racemase is less than or equal to that of permease but greater than the excess capacity of permease above the rate of assimilation.** D- and L-enantiomers are consumed simultaneously but in unequal rates. (TIF)

**Figure S5 Model-predicted uptake dynamics of racemic amino acids when the excess capacity of permease is greater than the capacity of the racemase.** Consumption of D-enantiomers begins after L-enantiomers are depleted, with rate that may be limited by assimilation (a) or racemization (b). (TIFF)

**Text S1 Model description.** (DOC)

## Acknowledgments

We thank Dr. K. H. Neelson for suggesting the rifampicin experiment and Mr. R. Kreidberg for editing of the manuscript.

## Author Contributions

Conceived and designed the experiments: HJS. Performed the experiments: GZ. Analyzed the data: HJS GZ. Contributed reagents/materials/analysis tools: HJS. Wrote the paper: HJS GZ.

## References

- Bada JL (1982) Racemization of amino acids in nature. *Interdiscipl Sci Rev* 7: 30–46.
- Kimber RWL, Kennedy NM, Milnes AR (1994) Amino acid racemization dating of a 140000 year old tephra-loess-paleosol sequence on the Mamaku Plateau near Rotorua, New Zealand. *Aust J Earth Sci* 41: 19–26.
- Martínez-Rodríguez S, Martínez-Gómez AI, Rodríguez-Vico F, Clemente-Jiménez JM, Las Heras-Vázquez FJ (2010) Natural occurrence and industrial applications of D-amino acids: An overview. *Chem Biodivers* 7: 1531–1548.
- Drechsel H, Jung G (1998) Peptide siderophores. *J Pept Sci* 4: 147–181.
- Peypoux F, Bonmatin JM, Wallach J (1999) Recent trends in the biochemistry of surfactin. *Appl Microbiol Biotechnol* 51: 553–563.
- Rogers HJ (1974) Peptidoglycans (mucopolysaccharides): structure, function, and variations. *Ann NY Acad Sci* 235: 29–51.
- Nagata T, Meon B, Kirchman DL (2003) Microbial degradation of peptidoglycan in seawater. *Limnol Oceanogr* 48: 745–754.
- Veuger B, van Oevelen D, Boschker HTS, Middelburg JJ (2006) Fate of peptidoglycan in an intertidal sediment: An in situ <sup>13</sup>C-labeling study. *Limnol Oceanogr* 51: 1572–1580.
- Amelung W (2003) Nitrogen biomarkers and their fate in soil. *J Plant Nutr Soil Sc* 166: 677–686.
- Bada JL, Hoopes EA (1979) Alanine enantiomeric ratio in the combined amino acid fraction in seawater. *Nature* 282: 822–823.
- Lee C, Bada JL (1977) Dissolved amino acids in equatorial Pacific, Sargasso Sea, and Biscayne Bay. *Limnol Oceanogr* 22: 502–510.
- Griffin CV, Kimber RWL (1988) Racemization of amino acids in agricultural soils: an age effect? *Aust J Soil Res* 26: 531–536.
- Lomstein BA, Jørgensen BB, Schubert CJ, Niggemann J (2006) Amino acid biogeo- and stereochemistry in coastal Chilean sediments. *Geochim Cosmochim Acta* 70: 2970–2989.
- Pedersen AGU, Thomsen TR, Lomstein BA, Jørgensen NOG (2001) Bacterial influence on amino acid enantiomerization in a coastal marine sediment. *Limnol Oceanogr* 46: 1358–1369.
- McCarthy MD, Hedges JL, Benner R (1998) Major bacterial contribution to marine dissolved organic nitrogen. *Science* 281: 231–234.
- Brinton KLF, Tsapin AI, Gilichinsky D, McDonald GD (2002) Aspartic acid racemization and age-depth relationships for organic carbon in Siberian permafrost. *Astrobiology* 2: 77–82.
- Dittmar T, Fitznar HP, Kattner G (2001) Origin and biogeochemical cycling of organic nitrogen in the eastern Arctic Ocean as evident from D- and L-amino acids. *Geochim Cosmochim Acta* 65: 4103–4114.
- Amelung W, Zhang X, Flach KW (2006) Amino acids in grassland soils: Climatic effects on concentrations and chirality. *Geoderma* 130: 207–217.
- Pollegioni L, Piubelli L, Sacchi S, Pilone MS, Molla G (2007) Physiological functions of D-amino acid oxidases: from yeast to humans. *Cell Mol Life Sci* 64: 1373–1394.
- D'Aniello A, D'Onofrio G, Pischetola M, D'Aniello G, Vetere A, et al. (1993) Biological role of D-amino acid oxidase and D-aspartate oxidase: Effects of D-amino acids. *J Biol Chem* 268: 26941–26949.
- Gabler M, Fischer L (1999) Production of a new D-amino acid oxidase from the fungus *Fusarium oxysporum*. *Appl Environ Microbiol* 65: 3750–3753.
- LaRue TA, Spencer JFT (1967) The utilization of D-amino acids by yeasts. *Can J Microbiol* 13: 777–788.
- Takahashi S, Kakuichi T, Fujii K, Kera Y, Yamada RH (2005) Physiological role of D-aspartate oxidase in the assimilation and detoxification of D-aspartate in the yeast *Cryptococcus humicola*. *Yeast* 22: 1203–1212.
- Yow GY, Uo T, Yoshimura T, Esaki N (2006) Physiological role of D-amino acid N-acetyltransferase of *Saccharomyces cerevisiae*: detoxification of D-amino acids. *Arch Microbiol* 185: 39–46.
- Yurimoto H, Hasegawa T, Sakai Y, Kato N (2000) Physiological role of the D-amino acid oxidase gene, DAO1, in carbon and nitrogen metabolism in the methylotrophic yeast *Candida boidinii*. *Yeast* 16: 1217–1227.
- Aldag RW, Young JL (1970) D-amino acids in soils. I. uptake and metabolism by seedling maize and ryegrass. *Agron J* 62: 184–189.
- Forsum O, Svennerstam H, Ganeteg U, Näsholm T (2008) Capacities and constraints of amino acid utilization in *Arabidopsis*. *New Phytol* 179: 1058–1069.
- Friedman M, Levin CE (2012) Nutritional value of D-amino acids, D-peptides, and amino acid derivatives in mice. *Methods Mol Biol* 794:337–353.

29. Moore BC, Leigh JA (2005) Markerless mutagenesis in *Methanococcus maripaludis* demonstrates roles for alanine dehydrogenase, alanine racemase, and alanine permease. *J Bacteriol* 187: 972–979.
30. Uo T, Yoshimura T, Tanaka N, Takegawa K, Esaki N (2001) Functional characterization of alanine racemase from *Schizosaccharomyces pombe*: a eucaryotic counterpart to bacterial alanine racemase. *J Bacteriol* 183: 2226–2233.
31. Wasserman SA, Walsh CT, Botstein D (1983) Two alanine racemase genes in *Salmonella typhimurium* that differ in structure and function. *J Bacteriol* 153: 1439–1450.
32. Yoshimura T, Esaki N (2003) Amino acid racemases: Functions and mechanisms. *J Biosci Bioeng* 96: 103–109.
33. Pucci MJ, Thanassi JA, Ho HT, Falk PJ, Dougherty TJ (1995) *Staphylococcus haemolyticus* contains two D-glutamic acid biosynthetic activities, a glutamate racemase and a D-amino acid transaminase. *J Bacteriol* 177: 336–342.
34. Lester ED, Satomi M, Ponce A (2007) Microflora of extreme arid Atacama Desert soils. *Soil Biol Biochem* 39: 704–708.
35. Vollmer AT, Au F, Bamberg SA (1977) Observations on the distribution of microorganisms in desert soil. *Great Basin Nat* 37: 81–86.
36. Smith HD, Duncan AG, Neary PL, Lloyd CR, Anderson AJ, et al. (2012) *In situ* microbial detection in Mojave Desert soil using native fluorescence. *Astrobiology* 12: 247–257.
37. Perotti ME, Pollegioni L, Pitone MS (1991) Expression of D-amino acid oxidase in *Rhodotorula gracilis* under induction conditions: a biochemical and cytochemical study. *Eur J Cell Biol* 55: 104–113.
38. Sikora L, Marzluf GA (1982) Regulation of L-amino acid oxidase and of D-amino acid oxidase in *Neurospora crassa*. *Mol Gen Genet* 186: 33–39.
39. Simonetta MP, Verga R, Fretta A, Hanozet GM (1989) Induction of D-amino acid oxidase by D-alanine in *Rhodotorula gracilis* grown in defined medium. *J Gen Microbiol* 135: 593–600.
40. Yurimoto H, Hasegawa T, Sakai Y, Kato N (2001) Characterization and high-level production of D-amino acid oxidase in *Candida boidinii*. *Biosci Biotechnol Biochem* 65: 627–633.
41. Zhao MX, Bada JL (1995) Determination of  $\alpha$ -dialkylamino acids and their enantiomers in geological samples by high-performance liquid-chromatography after derivatization with a chiral adduct of *o*-phthalaldehyde. *J Chromatogr* 690: 55–63.
